# Supplementary material for: The relationship between ethylene-induced autophagy and reactive oxygen species in Arabidopsis root cells during the early stages of waterlogging stress
Source: PeerJ journal article supplement (doi:10.7717/peerj.15404), 2023-05-26

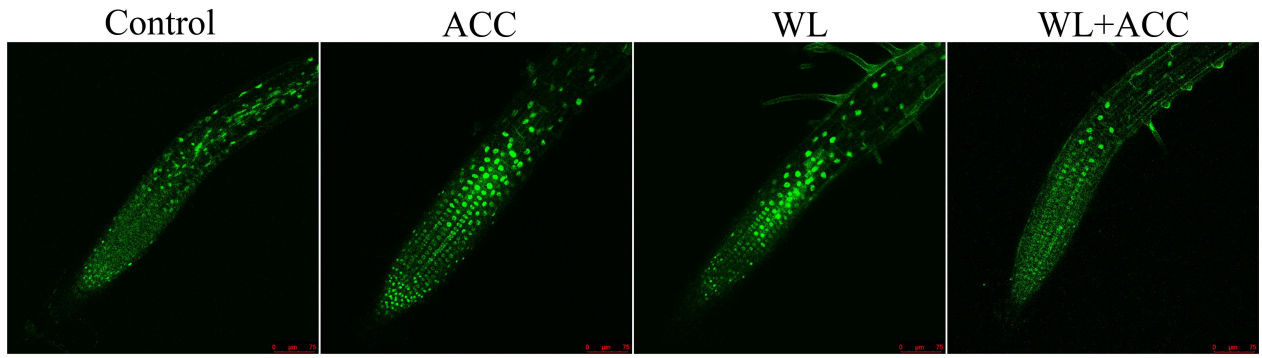

Supplement: Supplemental_figure_S1.pdf [file Supplemental_figure_S1.pdf]
